# Supplementary material for: Short‐ and Long‐Term Clinical Outcomes for Patients With Takotsubo Syndrome and Patients With Myocardial Infarction: A Report From the Swedish Coronary Angiography and Angioplasty Registry
Source: PubMed Central journal article supplement — J Am Heart Assoc. 2021 Sep 1;10(17):e017290. doi: 10.1161/JAHA.119.017290 (PMC8649294; doi:10.1161/jaha.119.017290), 2021-09-01
Supplement: JAH3-10-e017290-s001.pdf [file JAH3-10-e017290-s001.pdf]

# **SUPPLEMENTAL MATERIAL**

**Table S1. Definition of takotsubo syndrome used in the Swedish Coronary Angiography and Angioplasty Registry.**

---

**All 4 criteria must be met**

---

1. Transient wall motion abnormalities in the left or right ventricle (preceding negative emotional stress or somatic disease, trauma etc. is often, but not always, present)
  2. Absence of angiographic signs of plaque rupture (note that significant coronary artery disease may coexist with takotsubo syndrome)
  3. New ECG changes (ST-elevation or ST depression or T-wave inversion)
  4. Absence of myocarditis.
-

**Table S2. Unadjusted and adjusted risk of dying for patients with takotsubo versus STEMI or NSTEMI, by sex.**

| All-cause death                              | <b><u>Hazard Ratio (95% Confidence Interval)</u></b> |                    |                                |
|----------------------------------------------|------------------------------------------------------|--------------------|--------------------------------|
|                                              | <b>Women</b>                                         | <b>Men</b>         | <b>P<sub>interaction</sub></b> |
| <b>30 Day Prognosis</b>                      |                                                      |                    |                                |
| <i>Unadjusted</i>                            |                                                      |                    |                                |
| TS vs. STEMI                                 | 0.27 (0.21 – 0.36)                                   | 0.62 (0.43 – 0.90) | 0.0004                         |
| TS vs. NSTEMI                                | 1.32 (0.99 – 1.76)                                   | 2.17 (1.49 – 3.14) | 0.039                          |
| <i>MV adjustment*</i>                        |                                                      |                    |                                |
| TS vs. STEMI                                 | 0.56 (0.42 – 0.74)                                   | 0.68 (0.47 – 0.98) | 0.40                           |
| TS vs. NSTEMI                                | 2.76 (2.05 – 3.72)                                   | 2.85 (1.96 – 4.15) | 0.89                           |
| <b>30 Day – 5 Year Prognosis<sup>†</sup></b> |                                                      |                    |                                |
| <i>Unadjusted</i>                            |                                                      |                    |                                |
| TS vs. STEMI                                 | 0.69 (0.59 – 0.79)                                   | 0.93 (0.74 – 1.18) | 0.0002                         |
| TS vs. NSTEMI                                | 0.65 (0.56 – 0.76)                                   | 1.19 (1.14 – 1.24) | 0.031                          |
| <i>MV adjustment*</i>                        |                                                      |                    |                                |
| TS vs. STEMI                                 | 0.82 (0.70 – 0.96)                                   | 0.96 (0.76 – 1.22) | 0.25                           |
| TS vs. NSTEMI                                | 0.96 (0.82 – 1.12)                                   | 1.06 (0.84 – 1.35) | 0.47                           |

\*Multivariable shared frailty Cox proportional hazards regression adjusted for the following covariates: *age, diabetes, insulin-treated diabetes, hypertension, hyperlipidemia, current smoker, previous smoker, prior MI, prior PCI, calendar year*. Treating hospital was included in the model as a random effect. † Landmark analysis from 30 days. MV = multivariable; NSTEMI = Non ST-elevation myocardial infarction; STEMI = ST-elevation myocardial infarction; TS = Takotsubo syndrome

**Table S3. Unadjusted and adjusted risk of dying for patients with takotsubo versus STEMI or NSTEMI, by smoking status.**

| All-cause death                   | <u>Hazard Ratio (95% Confidence Interval)</u> |                    |                          |
|-----------------------------------|-----------------------------------------------|--------------------|--------------------------|
|                                   | Non-Smoker*                                   | Current Smoker     | P <sub>interaction</sub> |
| <b>30 Day Prognosis</b>           |                                               |                    |                          |
| <i>Unadjusted</i>                 |                                               |                    |                          |
| TS vs. STEMI                      | 0.33 (0.26 – 0.43)                            | 0.80 (0.53 – 1.23) | 0.0006                   |
| TS vs. NSTEMI                     | 1.32 (1.01 – 1.73)                            | 3.10 (1.98 – 4.86) | 0.002                    |
| <i>MV adjustment†</i>             |                                               |                    |                          |
| TS vs. STEMI                      | 0.52 (0.40 – 0.69)                            | 1.02 (0.66 – 1.57) | 0.01                     |
| TS vs. NSTEMI                     | 2.32 (1.77 – 3.06)                            | 4.61 (2.91 – 7.31) | 0.01                     |
| <b>30 Day – 5 Year Prognosis‡</b> |                                               |                    |                          |
| <i>Unadjusted</i>                 |                                               |                    |                          |
| TS vs. STEMI                      | 0.77 (0.67 – 0.88)                            | 1.49 (1.23 – 1.99) | <0.0001                  |
| TS vs. NSTEMI                     | 0.73 (0.63 – 0.84)                            | 1.25 (0.93 – 1.67) | 0.02                     |
| <i>MV adjustment†</i>             |                                               |                    |                          |
| TS vs. STEMI                      | 0.80 (0.69 – 0.92)                            | 1.24 (0.93 – 1.64) | 0.008                    |
| TS vs. NSTEMI                     | 0.92 (0.79 – 1.06)                            | 1.28 (0.97 – 1.71) | 0.044                    |

\*Non-smoker includes ex-smoker. There was no statistical interaction between ex-smoker and TS vs. STEMI/NSTEMI. †Multivariable shared frailty Cox proportional hazards regression adjusted for the following covariates: *age, sex, diabetes, insulin-treated diabetes, hypertension, hyperlipidemia, prior MI, prior PCI, calendar year. Treating hospital* was included the model as a random effect. ‡Landmark analysis from 30 days. MV = multivariable; NSTEMI = Non ST-elevation myocardial infarction; STEMI = ST-elevation myocardial infarction; TS = Takotsubo syndrome

**Table S4. Unadjusted and adjusted risk of dying for patients with takotsubo versus STEMI or NSTEMI, by age\*.**

| All-cause death                   | <u>Hazard Ratio (95% Confidence Interval)</u> |                    |                    | P <sub>interaction</sub> |
|-----------------------------------|-----------------------------------------------|--------------------|--------------------|--------------------------|
|                                   | 60 years                                      | 70 years           | 80 years           |                          |
| <b>30 Day Prognosis</b>           |                                               |                    |                    |                          |
| <i>Unadjusted</i>                 |                                               |                    |                    |                          |
| TS vs. STEMI                      | 0.55 (0.39 – 0.78)                            | 0.44 (0.36 – 0.56) | 0.36 (0.27 – 0.47) | 0.007                    |
| TS vs. NSTEMI                     | 2.59 (1.81 – 3.69)                            | 1.90 (1.51 – 2.39) | 1.40 (1.05 – 1.85) | 0.044                    |
| <i>MV adjustment†</i>             |                                               |                    |                    |                          |
| TS vs. STEMI                      | 0.59 (0.42 – 0.84)                            | 0.47 (0.37 – 0.59) | 0.37 (0.28 – 0.49) | 0.04                     |
| TS vs. NSTEMI                     | 2.94 (2.05 – 4.20)                            | 2.17 (1.72 – 2.74) | 1.61 (1.20 – 2.14) | 0.009                    |
| <b>30 Day – 5 Year Prognosis‡</b> |                                               |                    |                    |                          |
| <i>Unadjusted</i>                 |                                               |                    |                    |                          |
| TS vs. STEMI                      | 1.33 (1.08 – 1.64)                            | 1.01 (0.89 – 1.15) | 0.77 (0.66 – 0.89) | <0.0001                  |
| TS vs. NSTEMI                     | 1.16 (0.94 – 1.42)                            | 0.95 (0.83 – 1.07) | 0.77 (0.66 – 0.90) | 0.002                    |
| <i>MV adjustment†</i>             |                                               |                    |                    |                          |
| TS vs. STEMI                      | 1.48 (1.20 – 1.83)                            | 1.10 (0.96 – 1.25) | 0.82 (0.70 – 0.95) | <0.0001                  |
| TS vs. NSTEMI                     | 1.39 (1.12 – 1.71)                            | 1.14 (1.00 – 1.30) | 0.94 (0.81 – 1.10) | 0.004                    |

\*Age was modeled as a linear effect. The risk estimates refer to the estimated risks at ages 60, 70 and 80 years. †Multivariable shared frailty Cox proportional hazards regression adjusted for the following covariates: *sex, diabetes, insulin-treated diabetes, hypertension, hyperlipidemia, current smoker, previous smoker, prior MI, prior PCI, calendar year. Treating hospital* was included the model as a random effect. ‡Landmark analysis from 30 days. MV = multivariable; NSTEMI = Non ST-elevation myocardial infarction; STEMI = ST-elevation myocardial infarction; TS = Takotsubo syndrome.

**Table S5. Adjusted Risk of Mortality and Complications According to Health Care Region.**

| <u>Outcome</u>                  | <u>Adjusted Hazard Ratio*</u><br><u>(95% Confidence Interval)</u> | <u>p-value</u> | <u>P<sub>trend</sub>*</u> |
|---------------------------------|-------------------------------------------------------------------|----------------|---------------------------|
| <u>Health Care Region</u>       |                                                                   |                |                           |
| <u>Mortality within 30 days</u> |                                                                   |                | 0.22                      |
| Northern                        | 1.08 (0.37 - 3.17)                                                | 0.89           |                           |
| Uppsala-Orebro                  | 1.00 (0.50 - 1.97)                                                | 0.99           |                           |
| Stockholm                       | 1.38 (0.76- 2.52)                                                 | 0.29           |                           |
| Western                         | <i>1.00 (REF)</i>                                                 |                |                           |
| Southeast                       | 0.68 (0.23 - 1.97)                                                | 0.47           |                           |
| South                           | 2.52 (1.24 - 5.12)                                                | 0.011          |                           |
| <u>Mortality within 5 Years</u> |                                                                   |                | 0.031                     |
| Northern                        | 0.62 (0.31 - 1.23)                                                | 0.17           |                           |
| Uppsala-Orebro                  | 0.87 (0.64 - 1.18)                                                | 0.37           |                           |
| Stockholm                       | 0.99 (0.75 - 1.32)                                                | 0.96           |                           |
| Western                         | <i>1.00 (REF)</i>                                                 |                |                           |
| Southeast                       | 1.01 (0.67 - 1.51)                                                | 0.96           |                           |
| South                           | 1.30 (0.88 - 1.90)                                                | 0.18           |                           |
| <u>Acute Heart Failure</u>      |                                                                   |                | 0.002                     |
| Northern                        | 1.61 (0.89 - 2.90)                                                | 0.12           |                           |
| Uppsala-Orebro                  | 1.20 (0.91 - 1.60)                                                | 0.20           |                           |
| Stockholm                       | 1.05 (0.80- 1.39)                                                 | 0.70           |                           |
| Western                         | <i>1.00 (REF)</i>                                                 |                |                           |
| Southeast                       | 0.96 (0.63 - 1.46)                                                | 0.83           |                           |
| South                           | 0.72 (0.50 - 1.04)                                                | 0.079          |                           |
| <u>Cardiogenic Shock</u>        |                                                                   |                | 0.98                      |
| Northern                        | 1.02 (0.49 - 2.11)                                                | 0.97           |                           |
| Uppsala-Orebro                  | 0.90 (0.59 - 1.38)                                                | 0.62           |                           |
| Stockholm                       | 0.80 (0.53 - 1.20)                                                | 0.27           |                           |
| Western                         | <i>1.00 (REF)</i>                                                 |                |                           |
| Southeast                       | 0.87 (0.45 - 1.67)                                                | 0.66           |                           |
| South                           | 0.86 (0.53 - 1.41)                                                | 0.55           |                           |

\*trend test for a risk gradient from North to South. To derive a p-value for trend, regions were graded based on geographic location, from north to south.

Figure S1. Mortality risk in patients with TS, NSTEMI and STEMI: Age- and sex matched cohort.

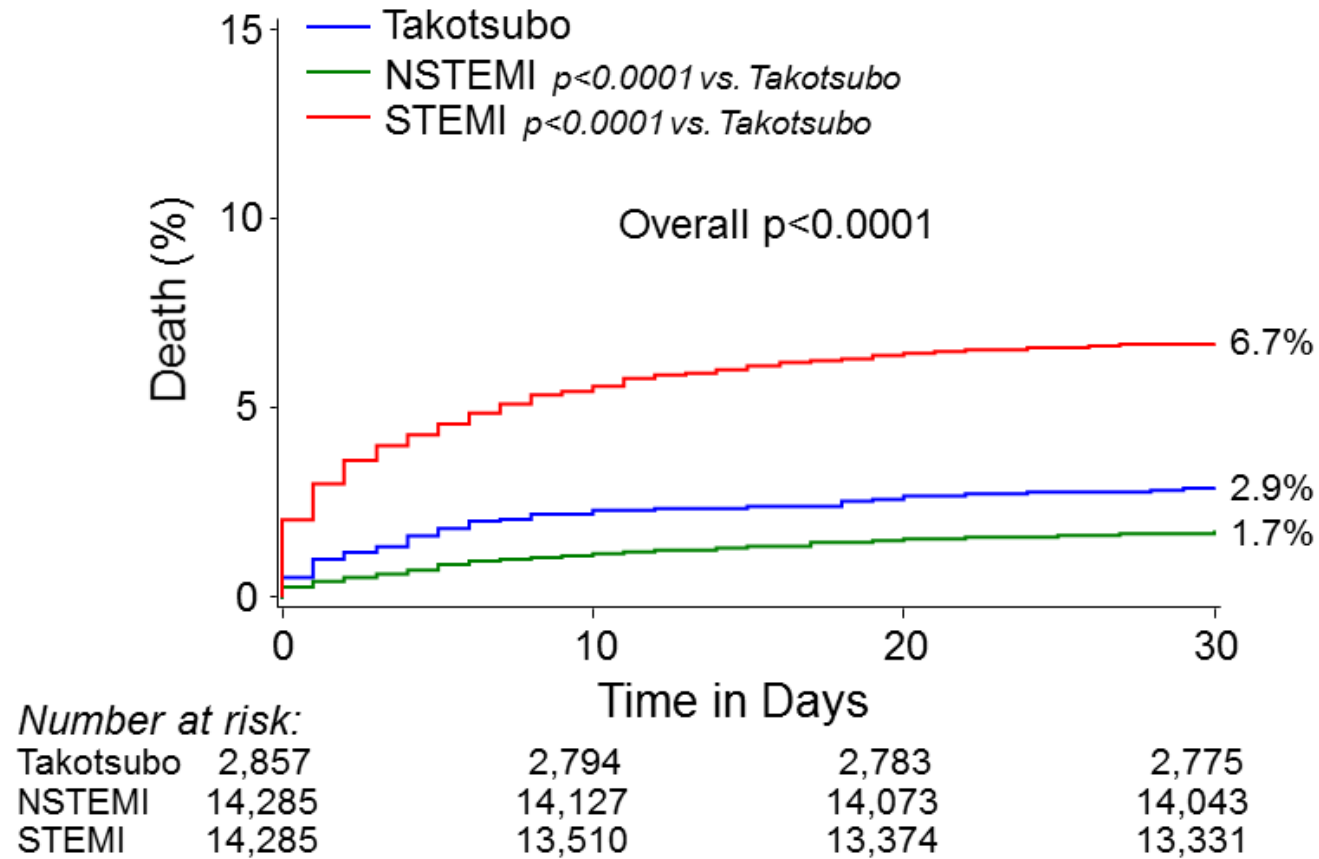

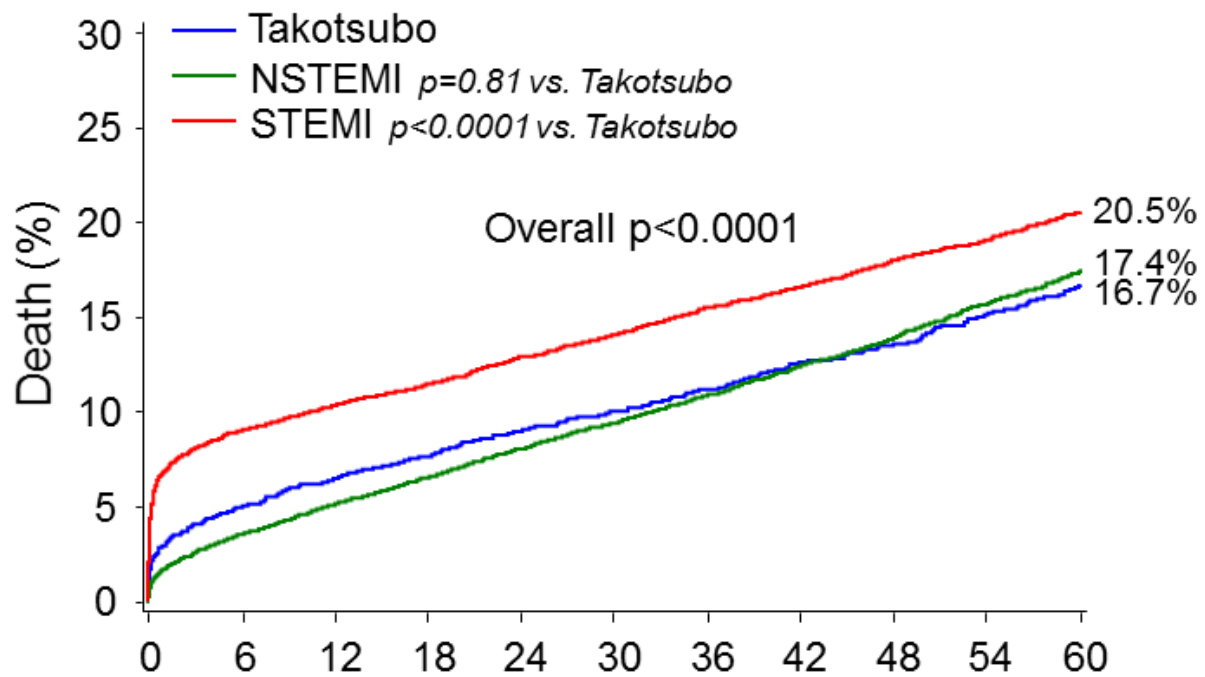

Number at risk:

|           | 0      | 6      | 12    | 18    | 24    | 30    | 36 | 42 | 48 | 54 | 60 |
|-----------|--------|--------|-------|-------|-------|-------|----|----|----|----|----|
| Takotsubo | 2,857  | 2,406  | 1,914 | 1,458 | 1,077 | 813   |    |    |    |    |    |
| NSTEMI    | 14,285 | 11,938 | 9,905 | 7,917 | 6,199 | 4,610 |    |    |    |    |    |
| STEMI     | 14,285 | 11,440 | 9,706 | 8,073 | 6,507 | 5,060 |    |    |    |    |    |



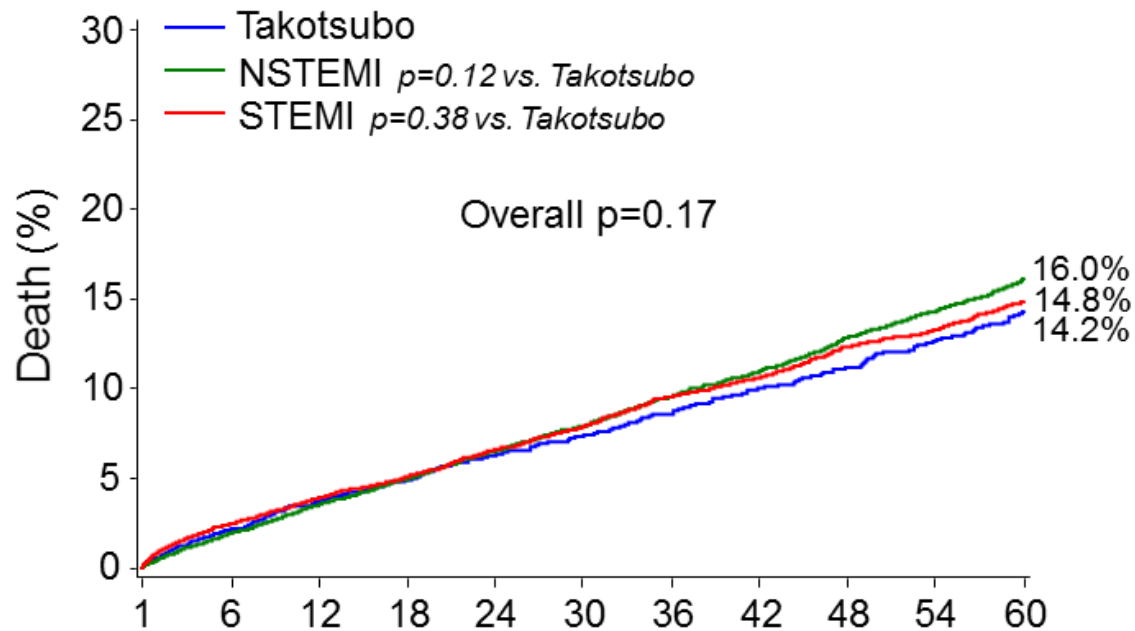

|                 | Time in Months |        |       |       |       |       |
|-----------------|----------------|--------|-------|-------|-------|-------|
| Number at risk: | 1              | 6      | 12    | 18    | 24    | 30    |
| Takotsubo       | 2,775          | 2,406  | 1,914 | 1,458 | 1,077 | 813   |
| NSTEMI          | 14,043         | 11,938 | 9,905 | 7,917 | 6,199 | 4,610 |
| STEMI           | 13,331         | 11,440 | 9,706 | 8,073 | 6,507 | 5,060 |

Kaplan-Meier failure rates. Each patient with TS was matched to 5 patients with STEMI and 5 patients with NSTEMI based on sex (exact match) and age ( $\pm 5$  years).

- A. Risk of dying within 30-days
- B. Risk of dying within 5 –years
- C. Landmark analysis: Risk of dying within 5 years for patients who were alive at 30 days.

NSTEMI = Non ST-elevation myocardial infarction; STEMI = ST-elevation myocardial infarction; TS = takotsubo syndrome

**Figure S2. Incidence of TS Among Patients Undergoing Coronary Angiography Due to Suspected NSTEMI or STEMI.**

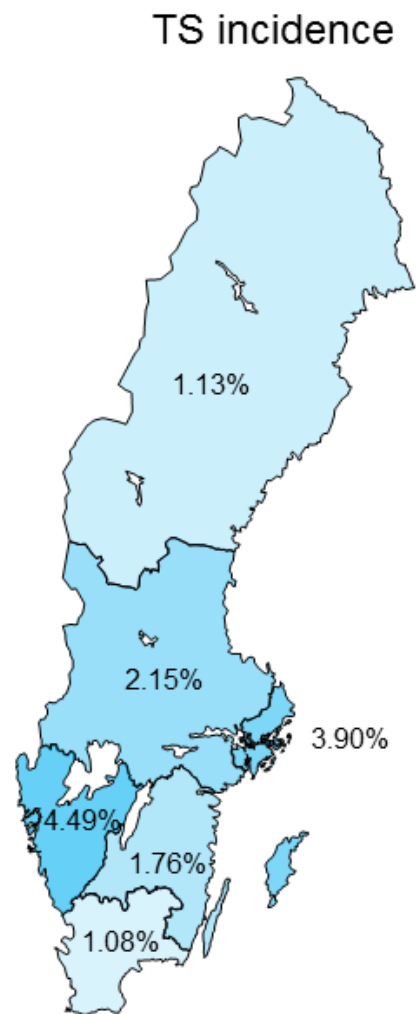

STEMI-associated  
TS-associated  $\gamma$   
30-day mortality

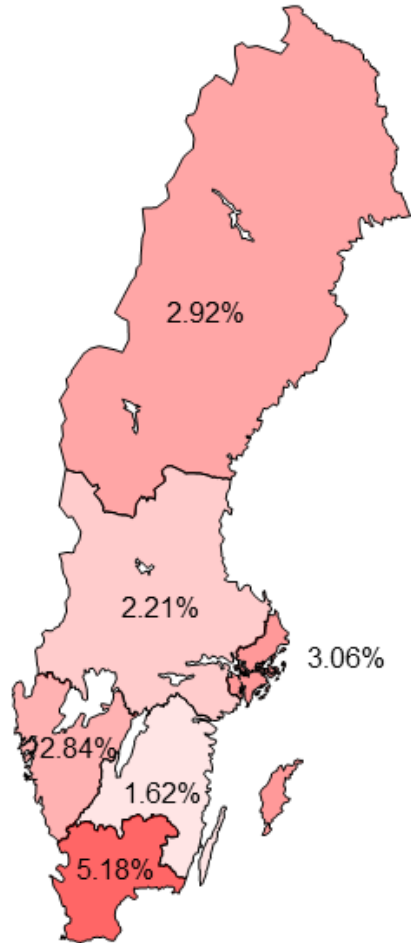

NSTEMI-associated  
30-day mortality

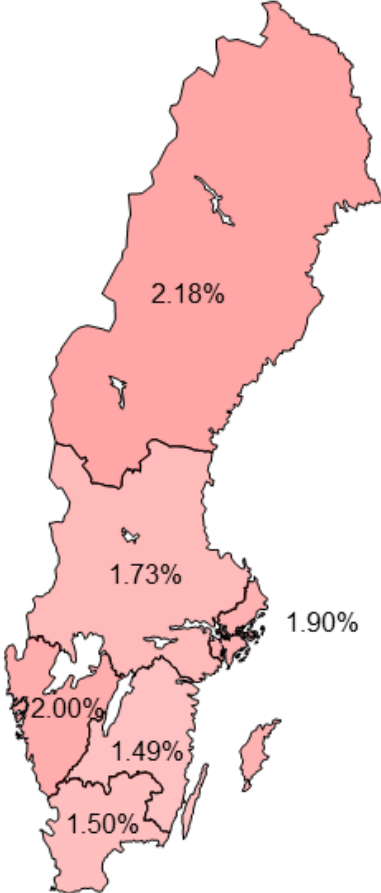

A. Incidence in Sweden

B. Incidence per health care region

\*The study period ended after February 2018.

**Figure S3. Regional Variations in Takotsubo Incidence and Prognosis.**

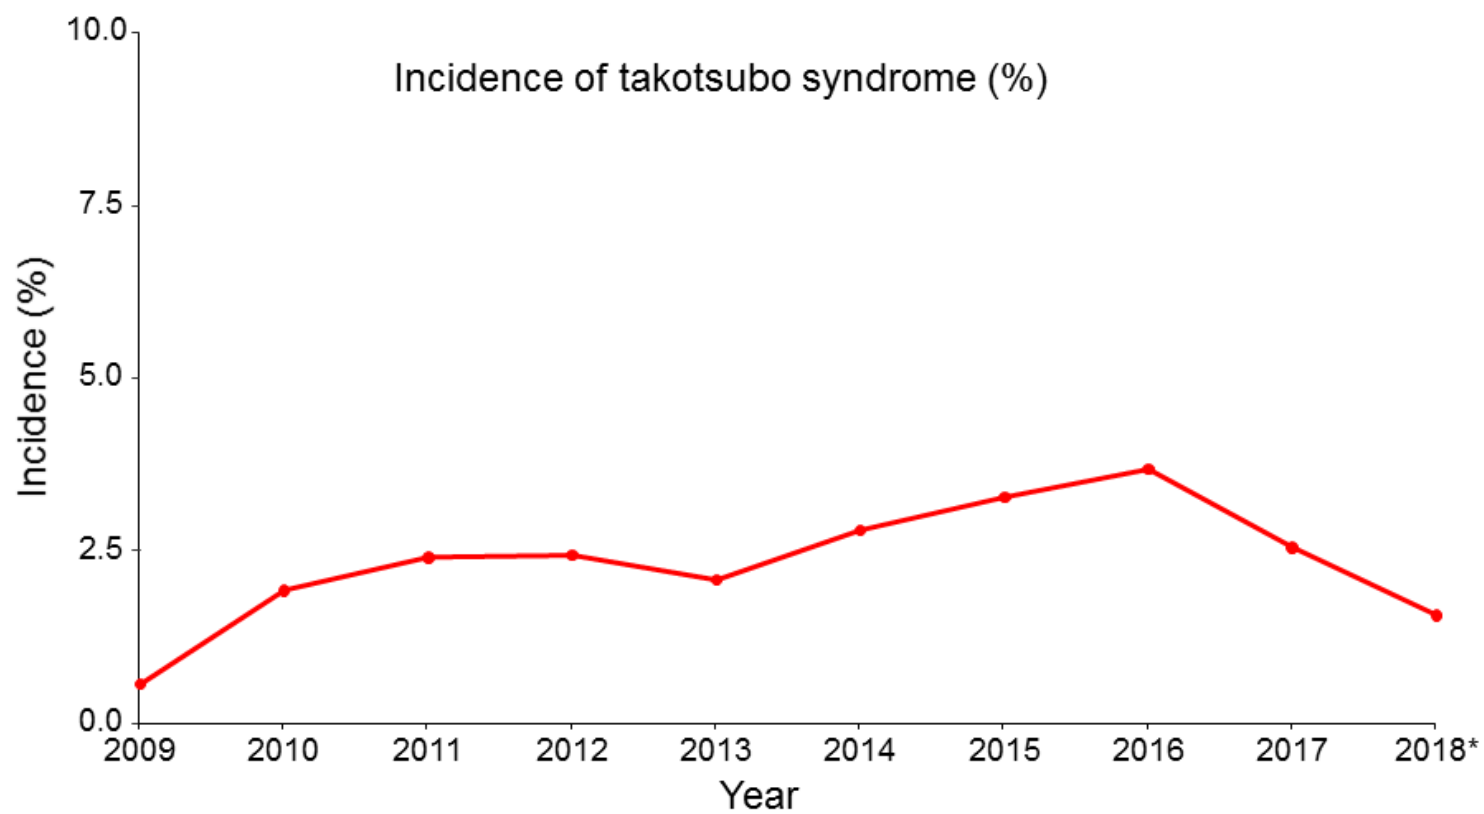

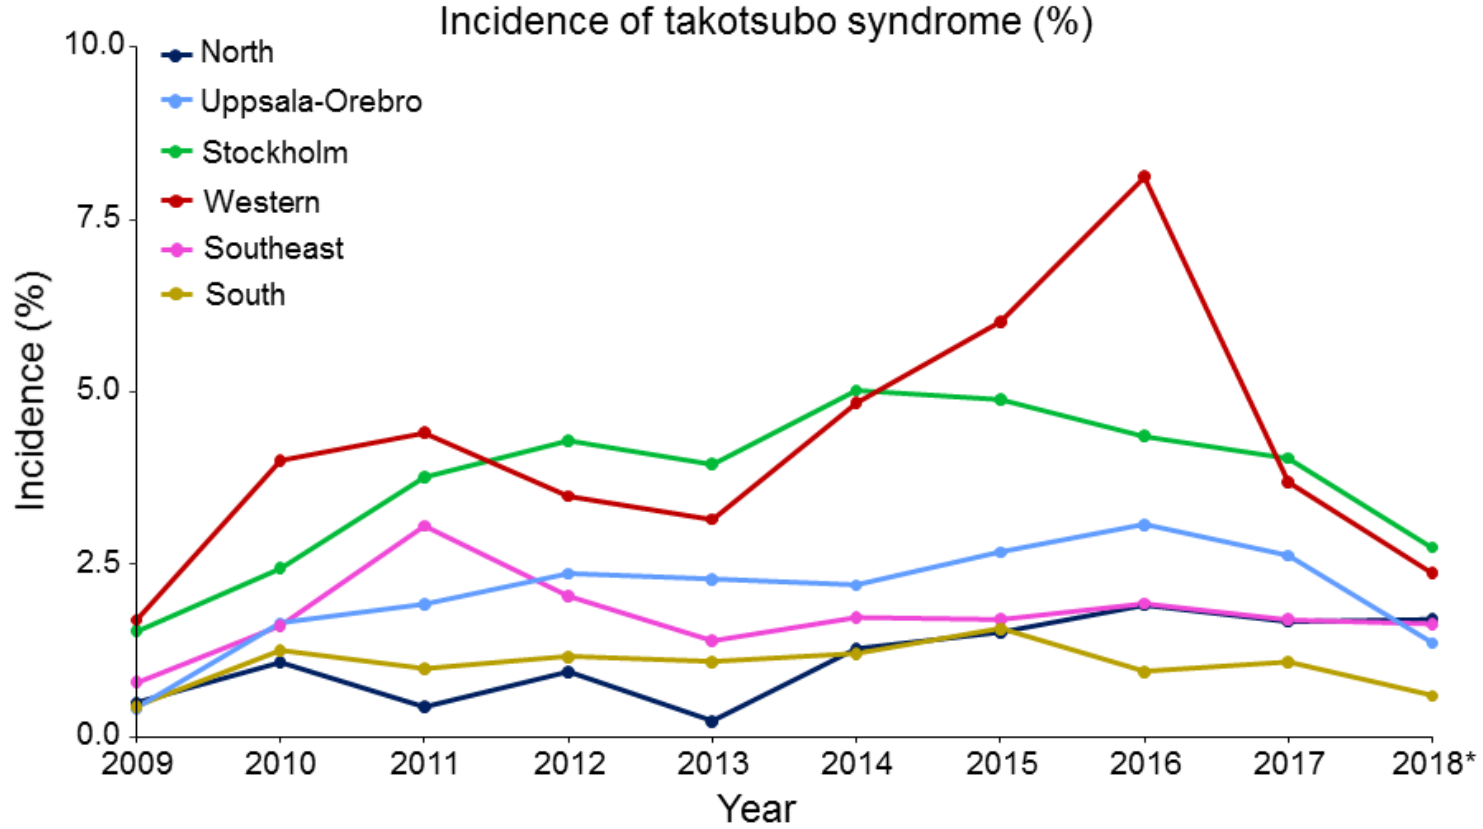

Regional differences in the incidence of takotsubo (A) and in the 30-day prognosis for patients with takotsubo (B), ST-elevation myocardial infarction (C) and non ST-elevation myocardial infarction (D). The six regions correspond to the six official healthcare regions in Sweden.
